# Supplementary material for: Functional neural network analysis in frontotemporal dementia and Alzheimer's disease using EEG and graph theory
Source: Springer Nature journal article supplement (doi:10.1186/1471-2202-10-101), 2009-08-21
Supplement: Additional file 1 [file 1471-2202-10-101-s1.doc]

**Additional file 1 – Threshold analysis**

Graph analysis results of unweighted networks as presented in this paper are dependent on an arbitrarily chosen threshold. To ensure reliability of findings, additional comparative analysis of network metrics as a function of threshold was performed (see for comparison [12]). Because most striking differences between patient groups were found in the lower alpha band, we focus on this frequency band.

For easier comparison between groups, we chose thresholds in such a way that the mean degree K was the same in the resulting networks. A K value is also more informative about a network then the real threshold value, since the latter depends on the connectivity measure used. Therefore, the figures of this threshold analysis report K-values on the X-axis, instead of the true threshold value.

The threshold analysis shows that the presented results are a robust finding, and the figures below illustrate that the significant results we found in the reported K=5 networks were representative for a broader range. Since small-world structure is best studied in sparse networks, and networks with an increasing mean degree will eventually become ‘random’ by definition, higher K levels than reported in the following figures were not studied. Likewise, to avoid disconnected graphs, lower K levels were not studied. [see additional files 2,3,and 4]

See also subsection ‘Methodological issues’ in the discussion section.
